# Supplementary material
Source: PubMed Central journal article supplement (PMC4070032)
Supplement: 97320630010251S1.pdf [file 97320630010251S1.pdf]

## Supplementary material:

**Table 1:** Potential miRNA-Target pairs derived from miRanda above the threshold values. MFE\* is calculated from RNAhybrid Program and Inhibition\*\* is predicted according to the findings of Brodersen *et al.* (2008).

| Cotton miRNA    | miRNA-Target pair                  | Target binding position | Score | MFE* (kCal/mol) | % Complem-Inhibition** -entarity |             |
|-----------------|------------------------------------|-------------------------|-------|-----------------|----------------------------------|-------------|
| <i>AC1</i> Gene |                                    |                         |       |                 |                                  |             |
| ghr-miR395a,d   | Query: 3' uucAAGGGGGUUUGUGAAGUu 5' | 795-815                 | 166   | -28.1           | 100.00                           | Cleavage    |
|                 | Ref: 5' ocaTTTCCTCAAAACACTTTAa 3'  |                         |       |                 |                                  |             |
| ghr-miR395a,d   | Query: 3' uucaagGGGGUUUGUGAAGUu 5' | 210-230                 | 139   | -28.0           | 100.00                           | Cleavage    |
|                 | Ref: 5' caqaaaCCCCAGACATTTCGa 3'   |                         |       |                 |                                  |             |
| <i>AC4</i> Gene |                                    |                         |       |                 |                                  |             |
| ghr-miR395a,d   | Query: 3' uucaagGGGGUUUGUGAAGUu 5' | 53-73                   | 139   | -28.0           | 100.00                           | Cleavage    |
|                 | Ref: 5' cagaaaCCCCAGACATTTCGa 3'   |                         |       |                 |                                  |             |
| <i>AV1</i> Gene |                                    |                         |       |                 |                                  |             |
| ghr-miR168      | Query: 3' ggGUGCUGGACGUGGUUcgu 5'  | 688-707                 | 116   | -25.2           | 93.33                            | Cleavage    |
|                 | Ref: 5' taCATGGCTTGACTCAtgc 3'     |                         |       |                 |                                  |             |
| ghr-miR779      | Query: 3' uacucgucgUUGUACUUCUgu 5' | 490-510                 | 128   | -22.6           | 90.00                            | Translation |
|                 | Ref: 5' aotaccccAaCCGTGAAGAc 3'    |                         |       |                 |                                  |             |
| ghr-miR3476     | Query: 3' cguCGGUUGUUUGGUCAAGu 5'  | 475-495                 | 143   | -25.0           | 88.24                            | Cleavage    |
|                 | Ref: 5' tttGATAACGAGCCAGTACg 3'    |                         |       |                 |                                  |             |
